# Supplementary material for: Carbon emission reductions due to high-temperature stress are insufficient to offset carbon sequestration losses
Source: Research Square preprint supplement (doi:10.21203/rs.3.rs-5598772/v1), 2025-01-09
Supplement: Supplementary file 1 [file 09004ae5cebd5490e913a85f.docx]

Supplementary information for

**Carbon emission reductions due to high-temperature stress are insufficient to offset carbon sequestration losses**

Yuqing Shao1, Changqing Jing1,*, Tim Van de Voorde2, Rafiq Hamdi3, Xiuliang Yuan4,5

1 College of Grassland Science, Xinjiang Agricultural University, Urumqi 830052, China

2 Department of Geography, Ghent University, Ghent 9000, Belgium

3 Royal Meteorological Institute, Brussels 1180, Belgium

4 Key Laboratory of Ecological Safety and Sustainable Development in Arid Lands, Xinjiang Institute of Ecology and Geography, Chinese Academy of Sciences, Urumqi 830011, China

5 Key Laboratory of GIS & RS Application Xinjiang Uygur Autonomous Region, Urumqi 830011, China

Corresponding author: Changqing Jing ([jingchangqing@xjau.edu.cn](mailto:jingchangqing@xjau.edu.cn))

Address: Xinjiang Agricultural University, Urumqi, China.


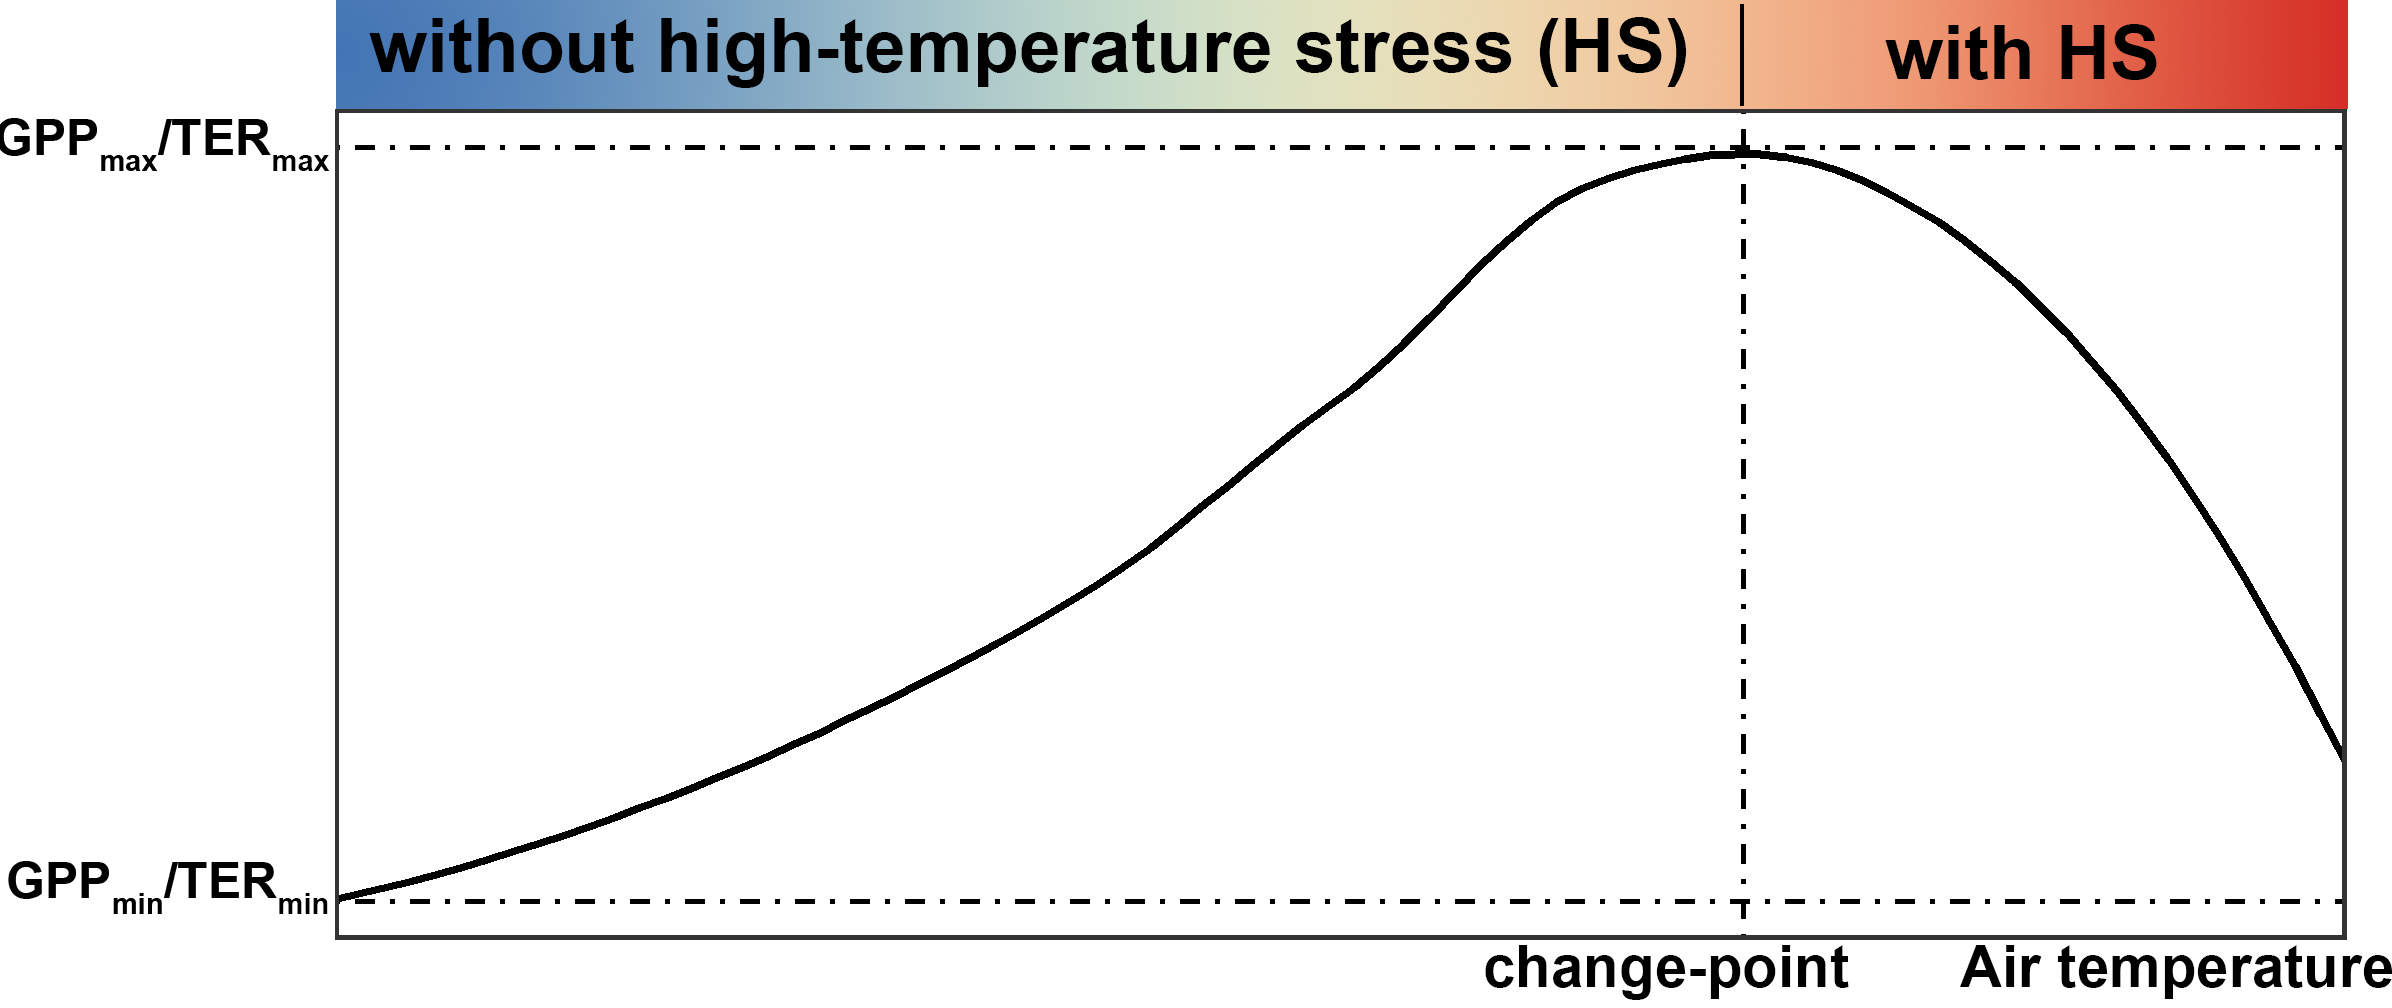


**Supplementary Fig. 1. Curves of gross primary productivity (GPP) and terrestrial ecosystem respiration (TER) in response to temperature.**


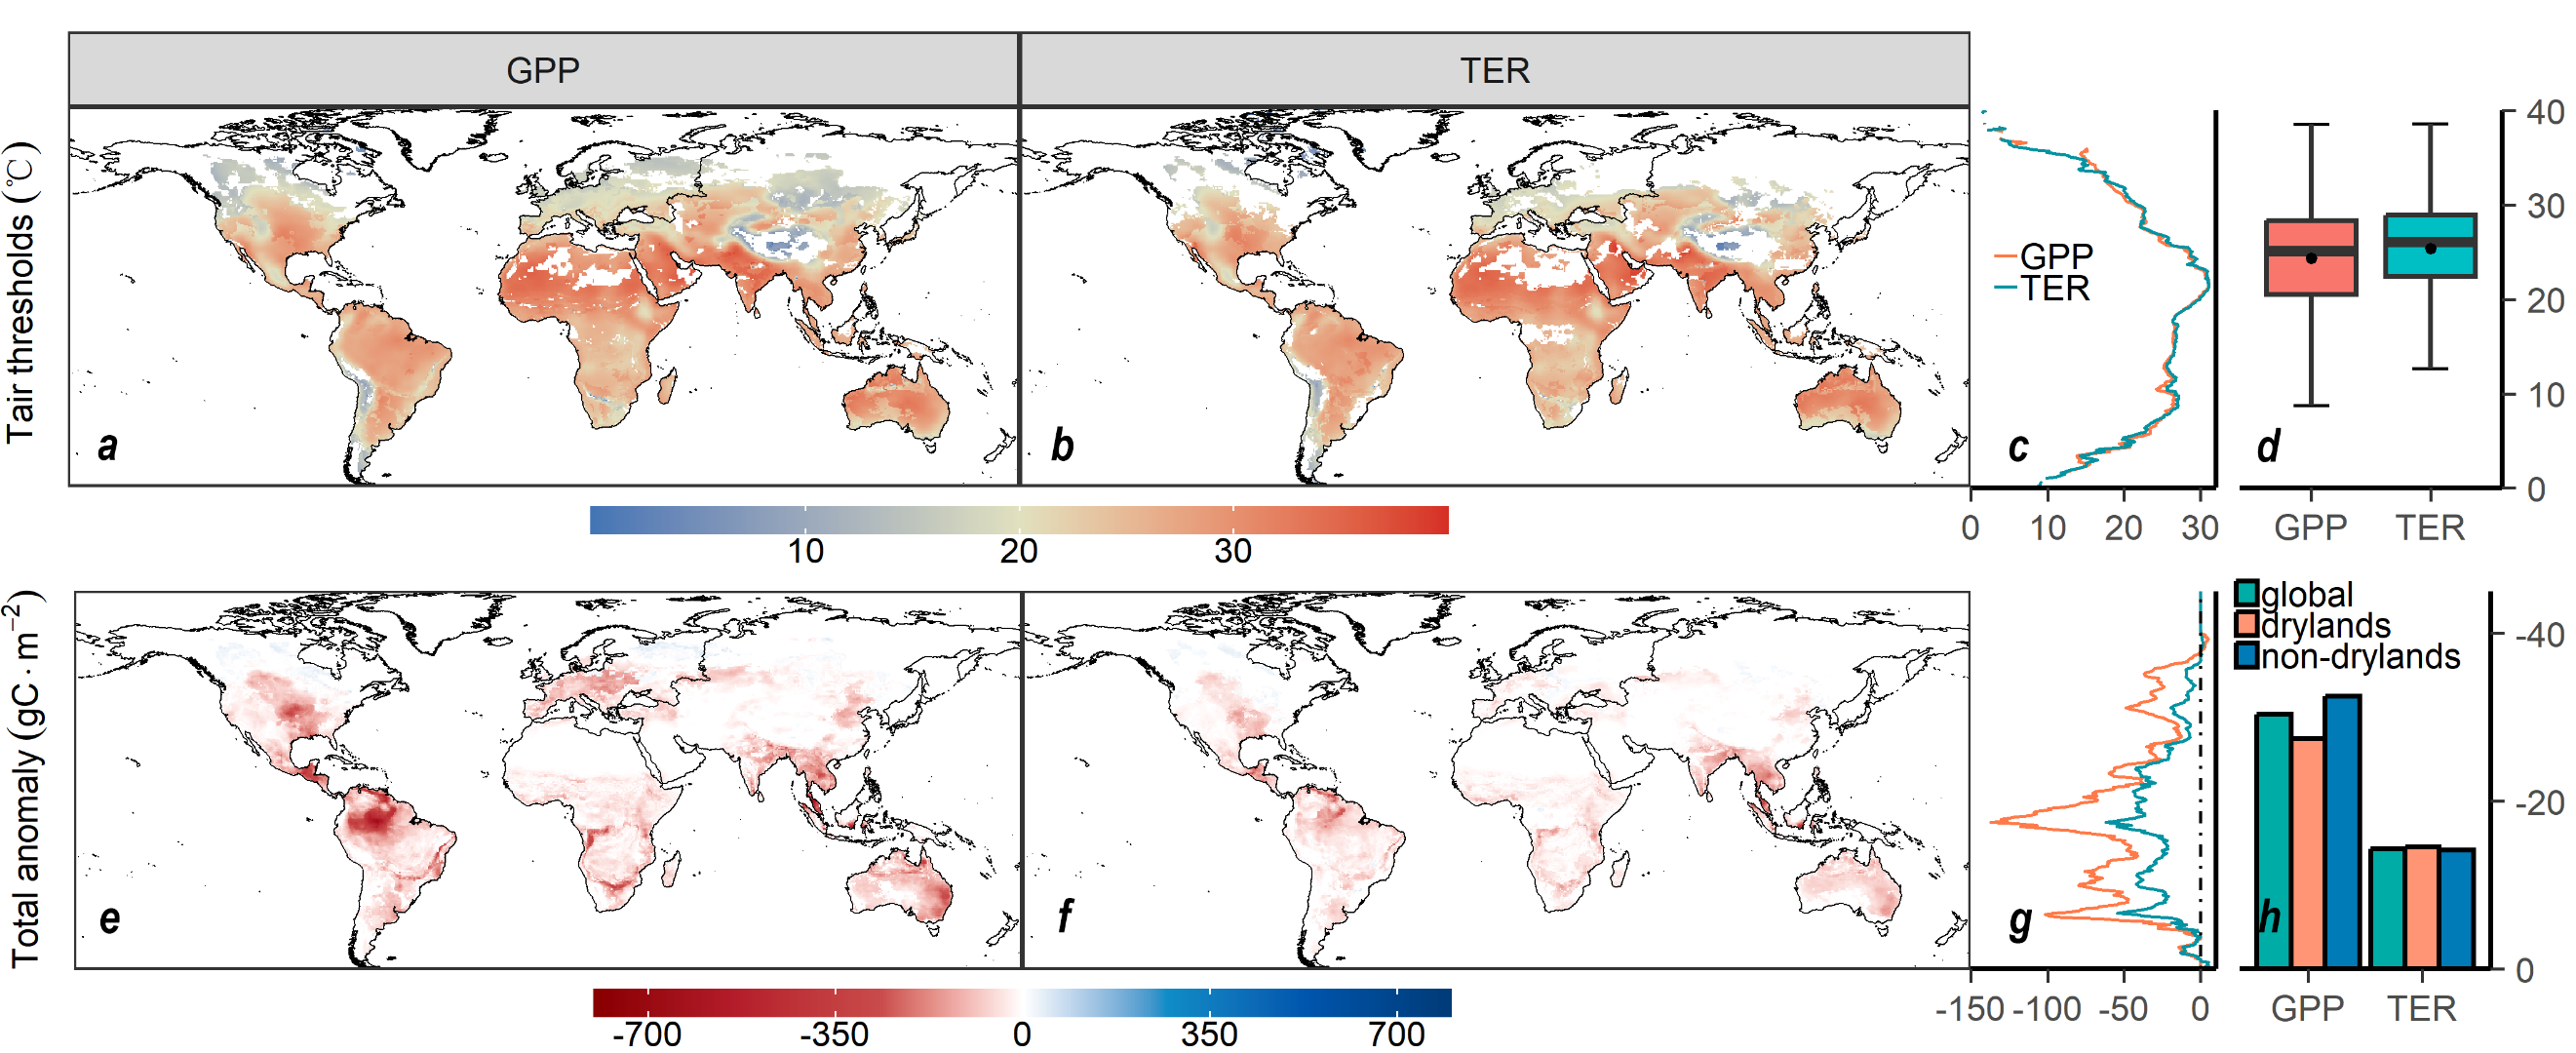


**Supplementary Fig. 2.** **Air temperature (Tair) thresholds and total carbon anomalies for GPP and TER in CMIP6 historical simulations (1980–2014).** **a-b**, Global spatial distribution of the Tair thresholds for GPP and TER. **c**, Latitudinal distribution ofTair thresholds for GPP and TER. **d**,Global changes distribution of Tair thresholds for GPP and TER. For each box, middle lines and dot indicate the median and mean across the globe; the box represents the interquartile range (the range from 25th to 75th) of the data and whiskers of the box represent the minimum and maximum values of the data, excluding outliers. **e-f**, Global spatial distribution of the total carbon anomalies (gC m-2) for GPP and TER. **g**, Latitudinal distribution ofthe total carbon anomalies. **h**, Differences in the total carbon anomalies of high-temperature stress (HS) across the globe, drylands, and non-drylands.


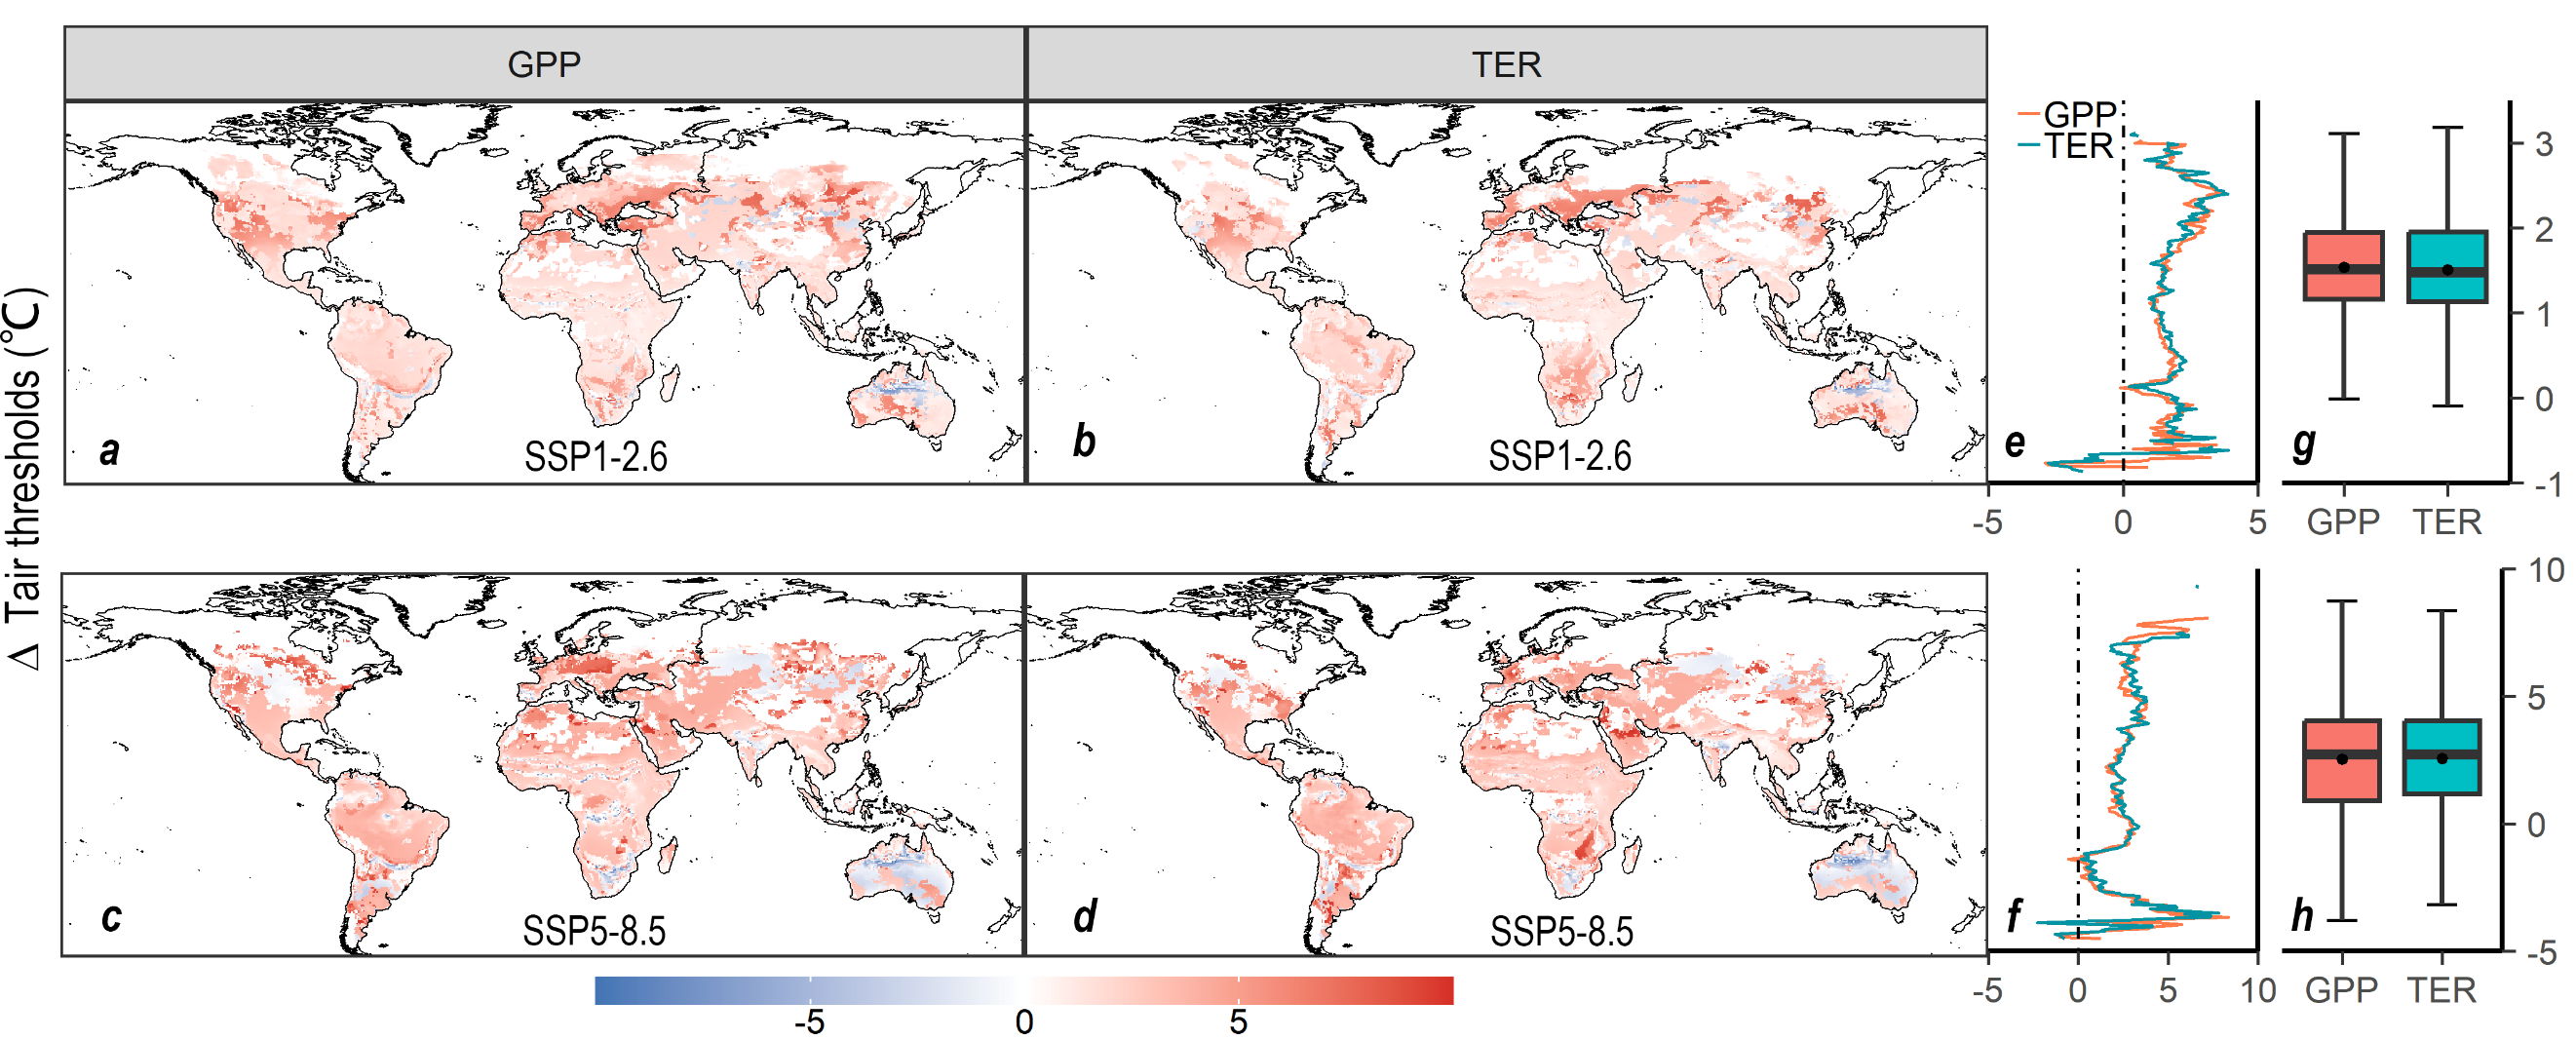


**Supplementary Fig. 3. Projected changes in the** **Tair thresholds of** **high-temperature stress (HS) in future simulations.** **a-b**, Global spatial distribution of changes in the air temperature (Tair) thresholds (future minus historical values, historical thresholds using the CMIP6 historical simulation) of HS in SSP1-2.6 and SSP5-8.5 simulations (2015–2100). **e-f**,Latitudinal distribution offuture changes in the Tair thresholds of HS. **g-h**,Global change distribution of future changes in the Tair thresholds for GPP and TER. For each box, middle lines and dot indicate the median and mean across the globe; the box represents the interquartile range (the range from 25th to 75th) of the data and whiskers of the box represent the minimum and maximum values of the data, excluding outliers.


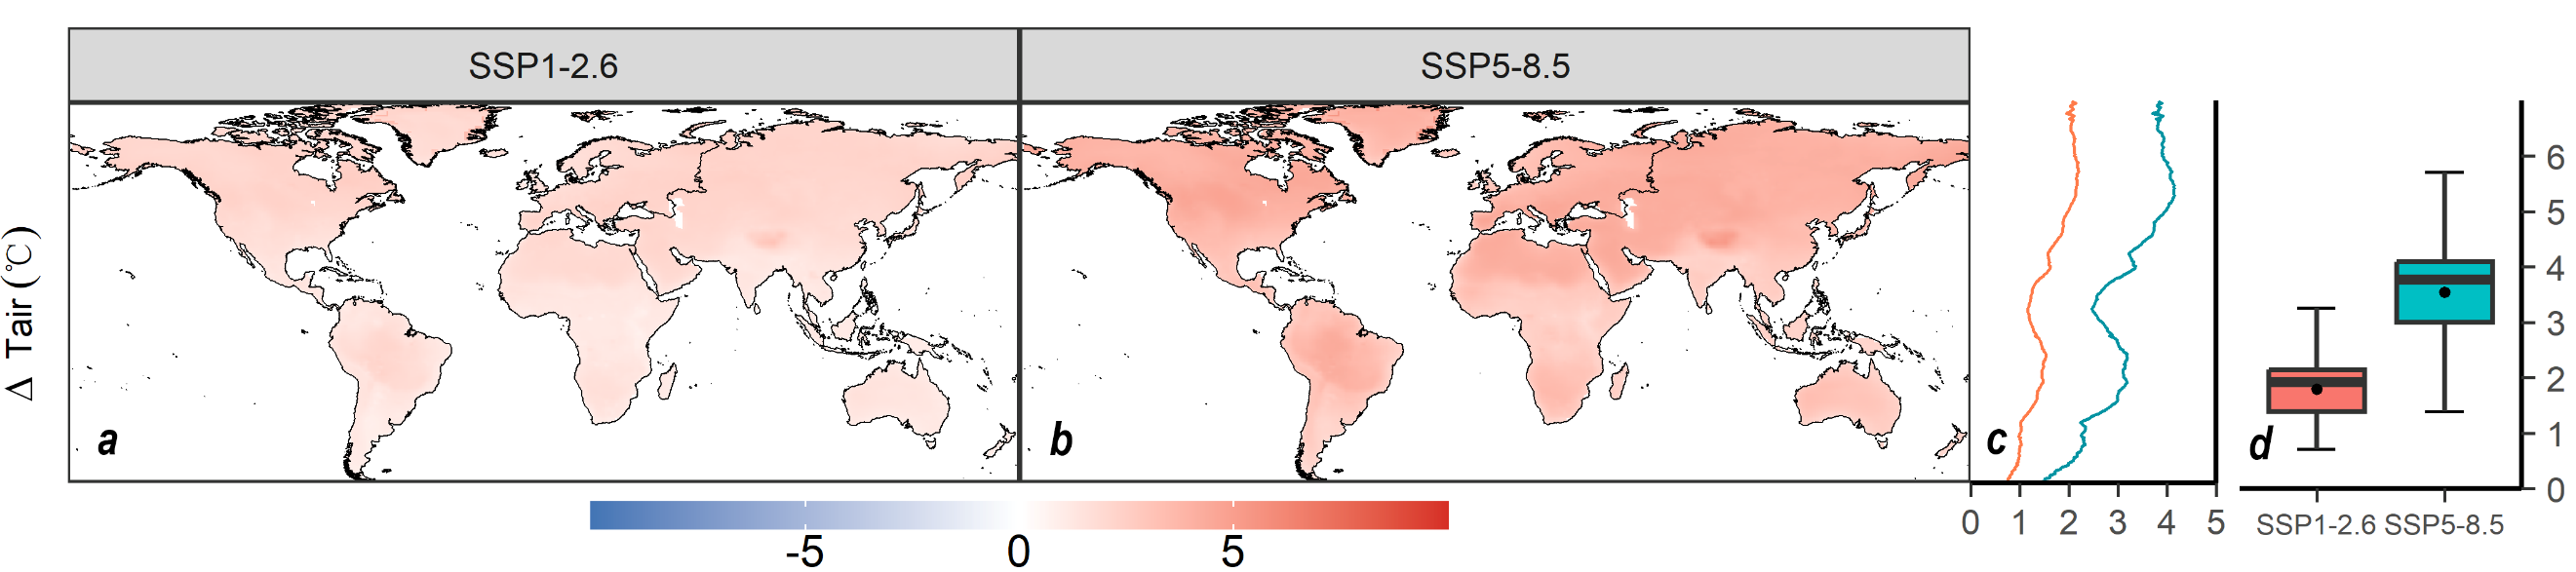


**Supplementary Fig. 4. Projected changes of air temperature (Tair) in future simulations.** SPP1-2.6 are shown in orange, and SSP5-8.5 in cyan.


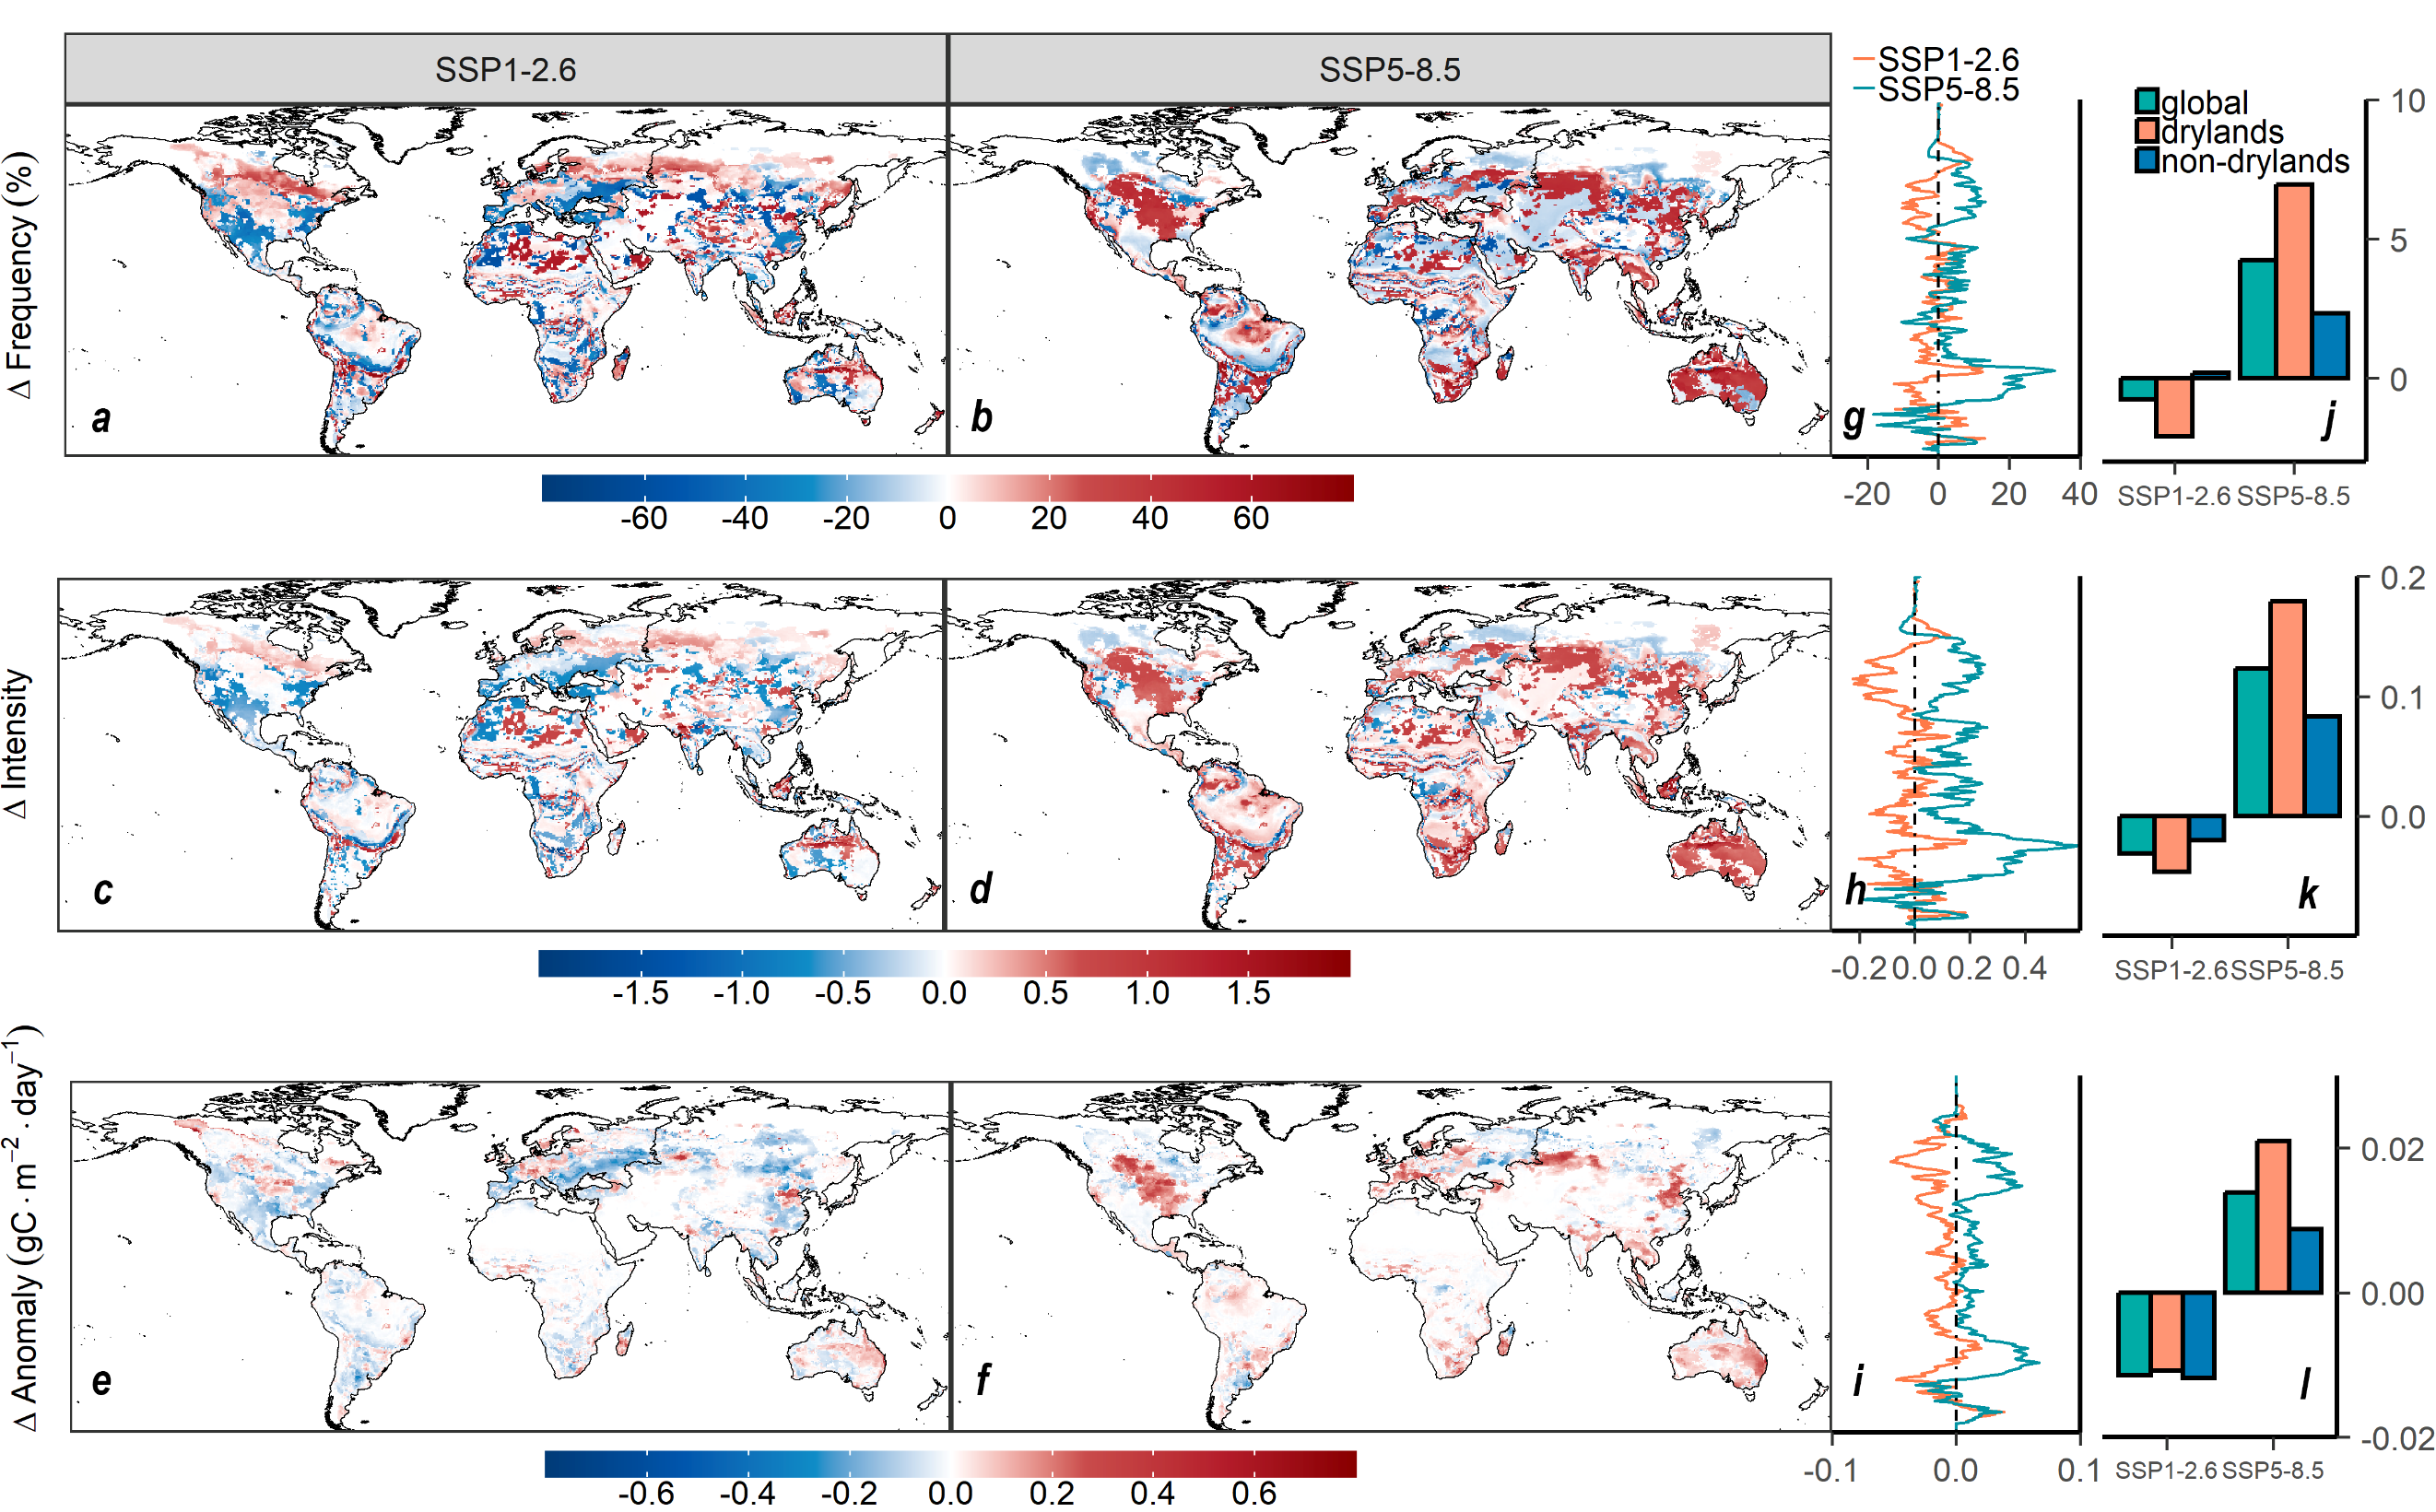


**Supplementary Fig. 5. Projected changes in the** **frequency, intensity and average carbon anomalies of high-temperature stress (HS) for gross primary productivity (GPP) in future simulations.** **a-f**,Global spatial distribution of changes in the frequency (future minus historical values, historical frequency, intensity and average carbon anomalies using the CMIP6 historical simulation), intensityandaverage carbon anomalies of HS in SSP1-2.6 and SSP5-8.5 simulations (2015–2100). **g-I**, Latitudinal distribution of changes in the frequency, intensity and average carbon anomalies of HS in SSP1-2.6 and SSP5-8.5. **j-l**, Differences in the frequency, intensity and average carbon anomalies of HS across the globe, drylands, and non-drylands in SSP1-2.6 and SSP5-8.5.


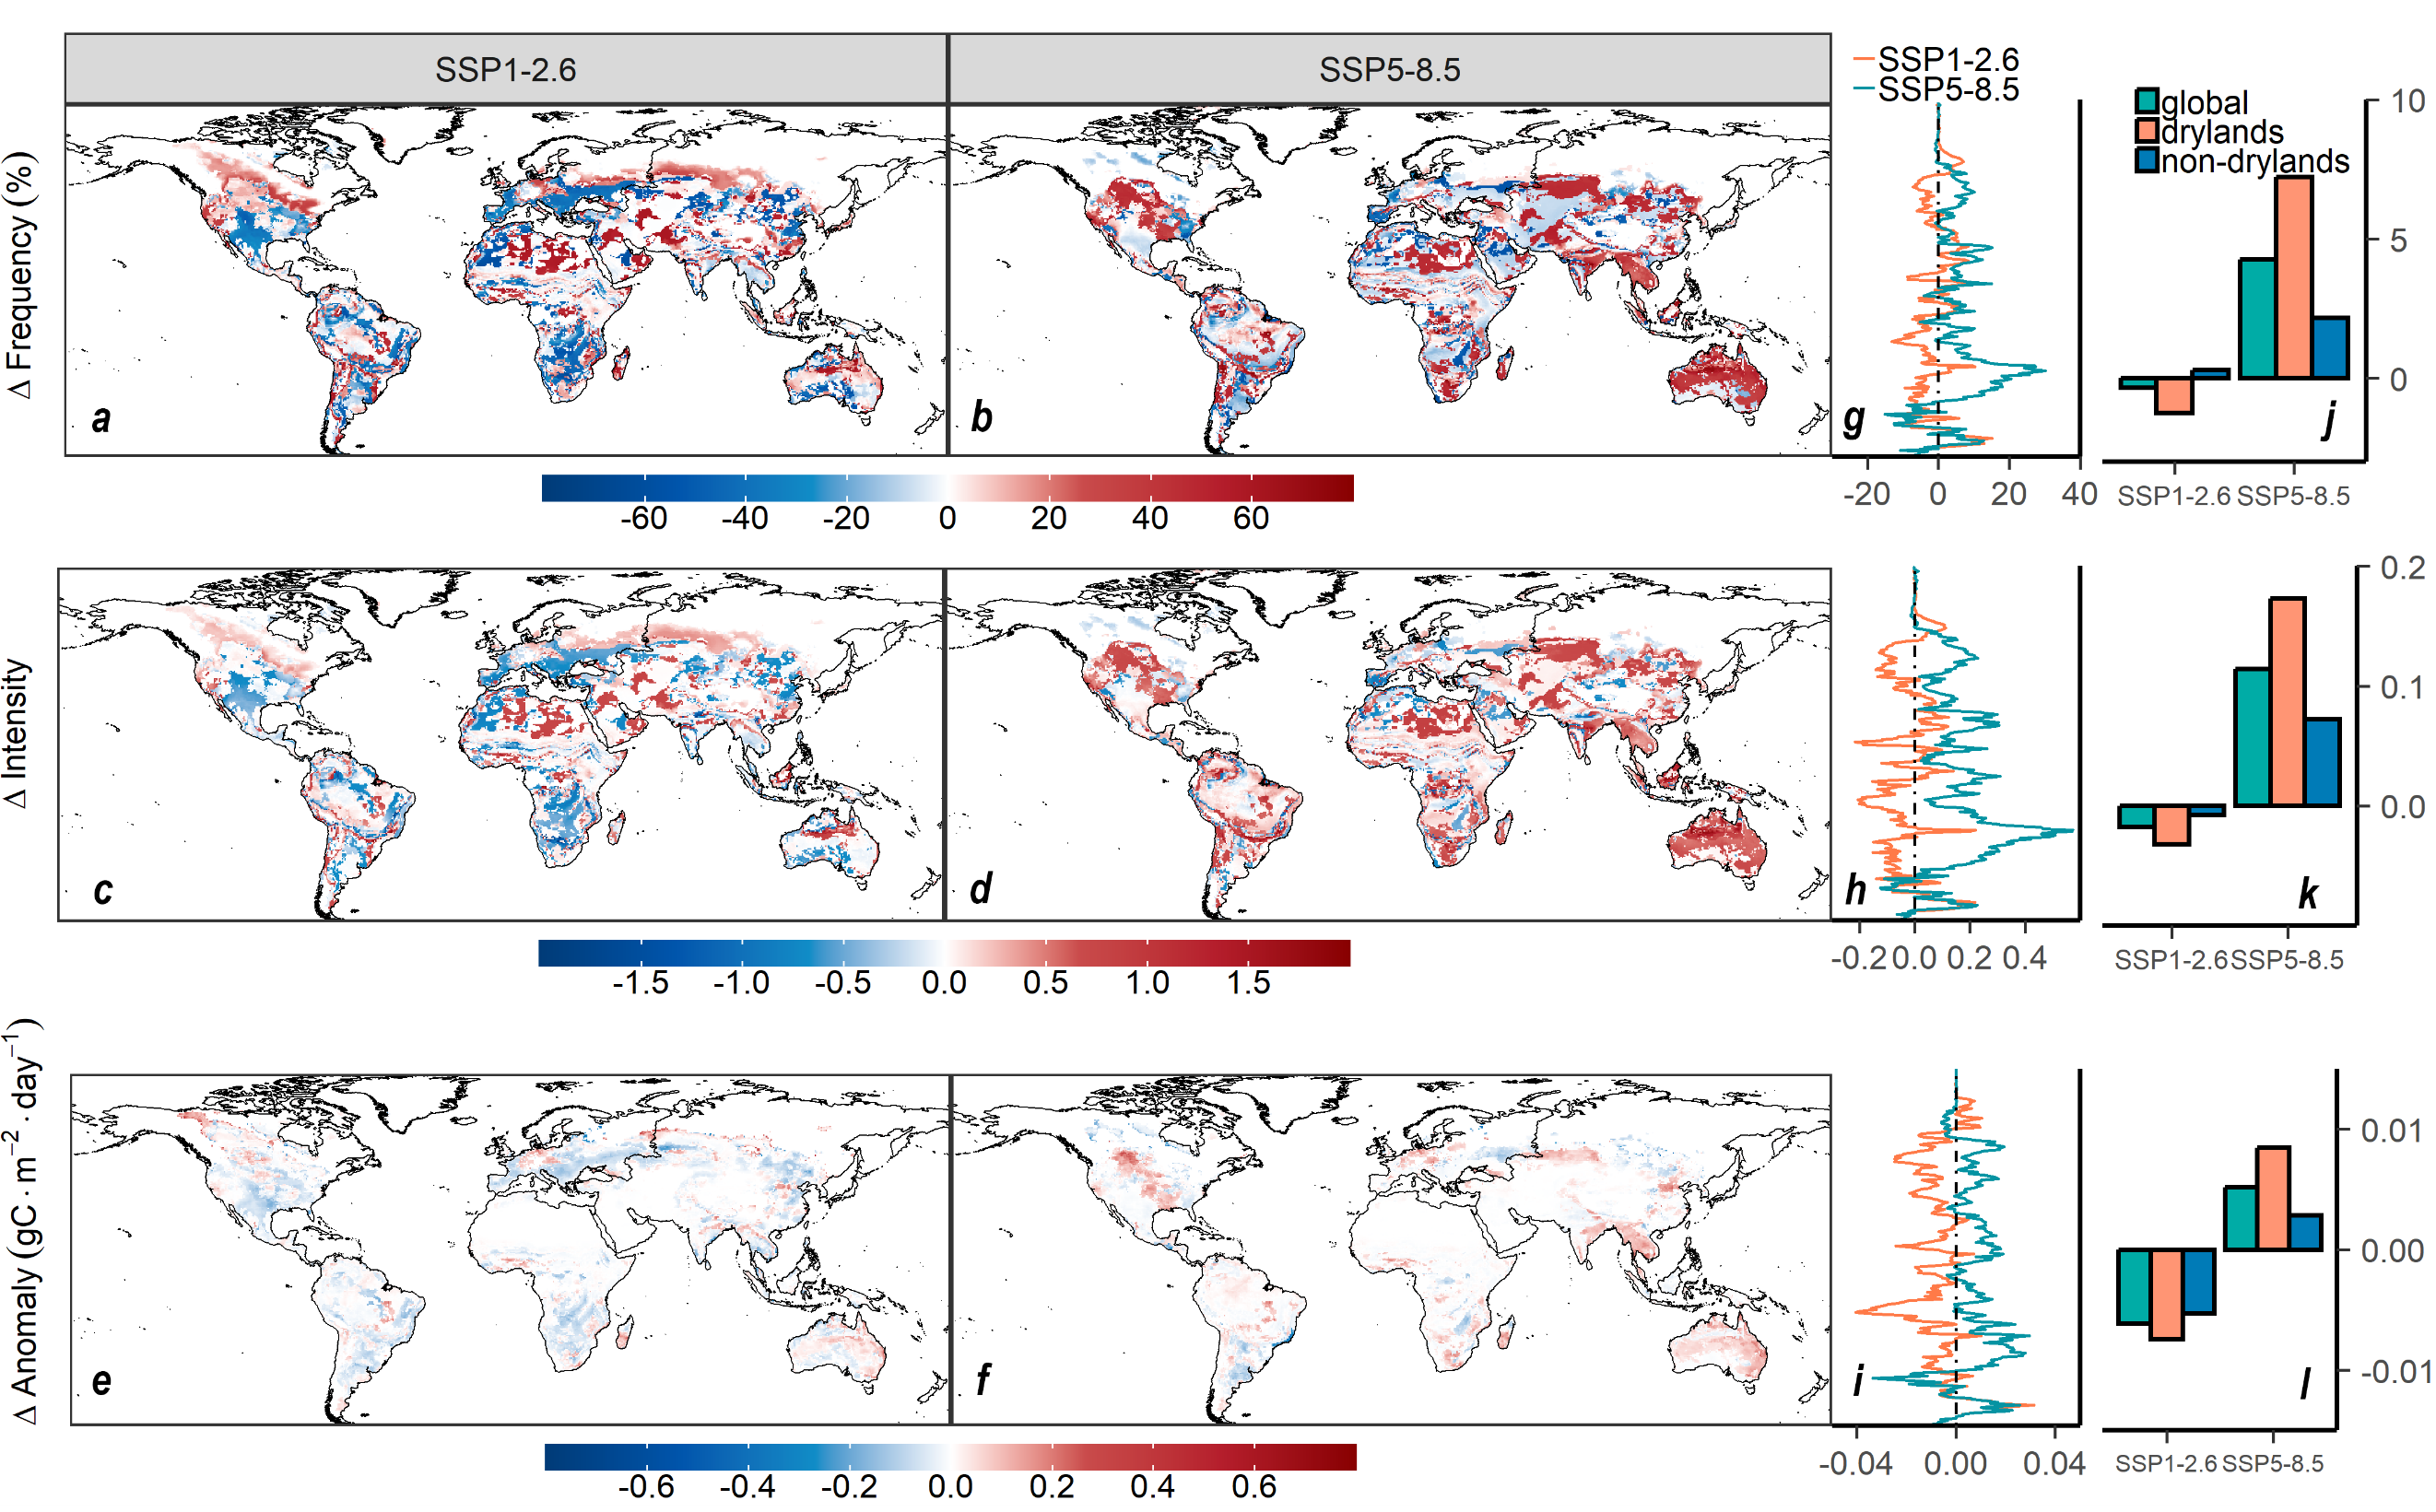


**Supplementary Fig. 6. Projected changes in the frequency, intensity and average carbon anomalies of high-temperature stress (HS) for terrestrial ecosystem respiration (TER) in future simulations. a-f**,Global spatial distribution of changes in the frequency (future minus historical values, historical frequency, intensity and average carbon anomalies using the CMIP6 historical simulation), intensityandaverage carbon anomalies of HS in SSP1-2.6 and SSP5-8.5 simulations (2015–2100). **g-I**, Latitudinal distribution of changes in the frequency, intensity and average carbon anomalies of HS in SSP1-2.6 and SSP5-8.5. **j-l**, Differences in the frequency, intensity and average carbon anomalies of HS across the globe, drylands, and non-drylands in SSP1-2.6 and SSP5-8.5.

**Supplementary Table 1. List of CMIP6 model simulations used in the study.**

| **Modeling Center** | **Institute** | **Model Name** | **Ensemble** | **Resolution** |
| --- | --- | --- | --- | --- |
| Commonwealth Scientific and Industrial Research Organisation | CRISO | ACCESS-ESM1-5 | r1i1p1f1 | 250km |
| Beijing Climate Center | BCC | BCC-CSM2-MR | 100km |
| Canadian Centre for Climate Modelling and Analysis | CCCma | CanESM5 | 500km |
| CanESM5-1 | 500km |
| National Center for Atmospheric Research | NCAR | CESM2-WACCM | 100km |
| Fondazione Centro Euro-Mediterraneo sui Cambiamenti Climatici | CMCC | CMCC-CM2-SR5 | 100km |
| CMCC-ESM2 | 100km |
| Max Planck Institute for Meteorology | MPI-M | MPI-ESM1-2-LR | 250km |
| Norwegian Climate Centre | NCC | NorESM2-LM | 250km |
